# Supplementary material for: Qualitative and quantitative analysis of 18F-GP1 positron emission tomography in thrombotic cardiovascular disease
Source: PubMed Central journal article supplement (PMC11538255; doi:10.1038/s41598-024-77151-w), 2024-11-05
Supplement: 41598_2024_77151_MOESM1_ESM.pdf [file 41598_2024_77151_MOESM1_ESM.pdf]

# Supplementary Materials

## Supplementary Results

### Supplementary Figure i.

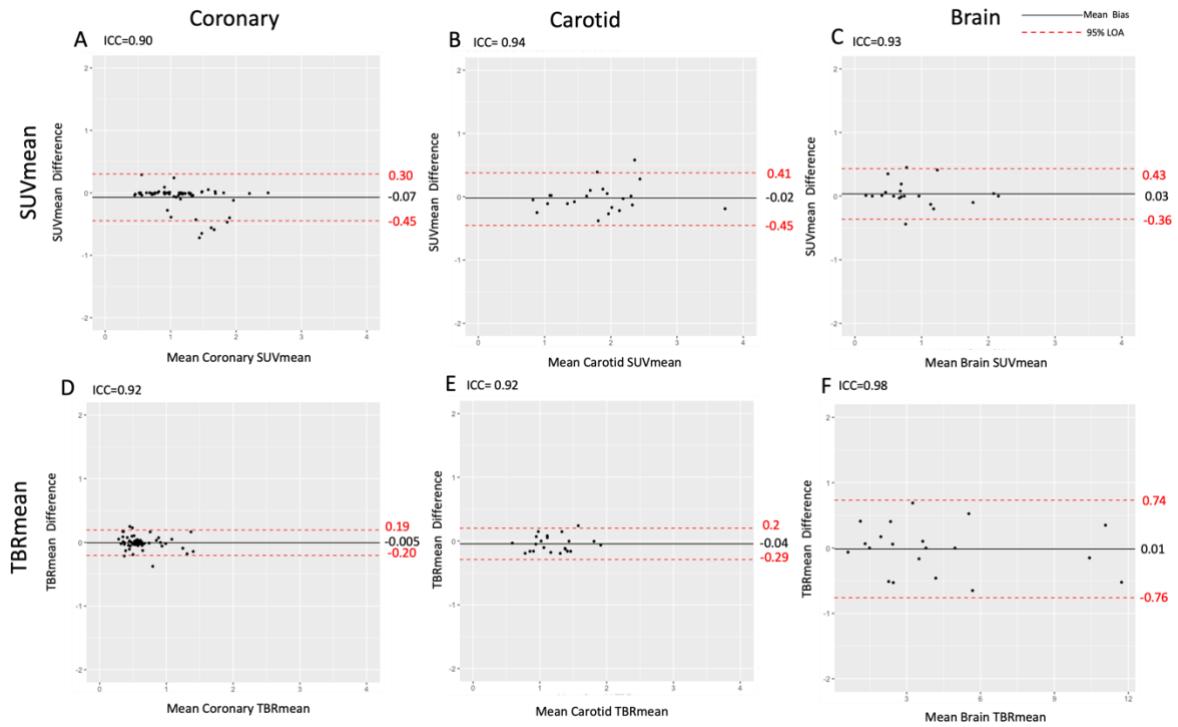

### Supplementary Figure i.

Intraobserver levels of Agreement in Quantitative Analysis of  $^{18}\text{F}$ -GP1 Uptake.

Figures show mean standardised uptake values ( $\text{SUV}_{\text{mean}}$ ; first row A-C), mean target to background ration ( $\text{TBR}_{\text{mean}}$ ; second row d-f), for coronary artery (first column), carotid arteries (second column) and brain (third column).

ICC = intraclass correlation coefficient, LOA= Limits of agreement.

Please note the difference in x-axis scale for brain  $\text{TBR}_{\text{mean}}$ .

Supplementary Figure ii.

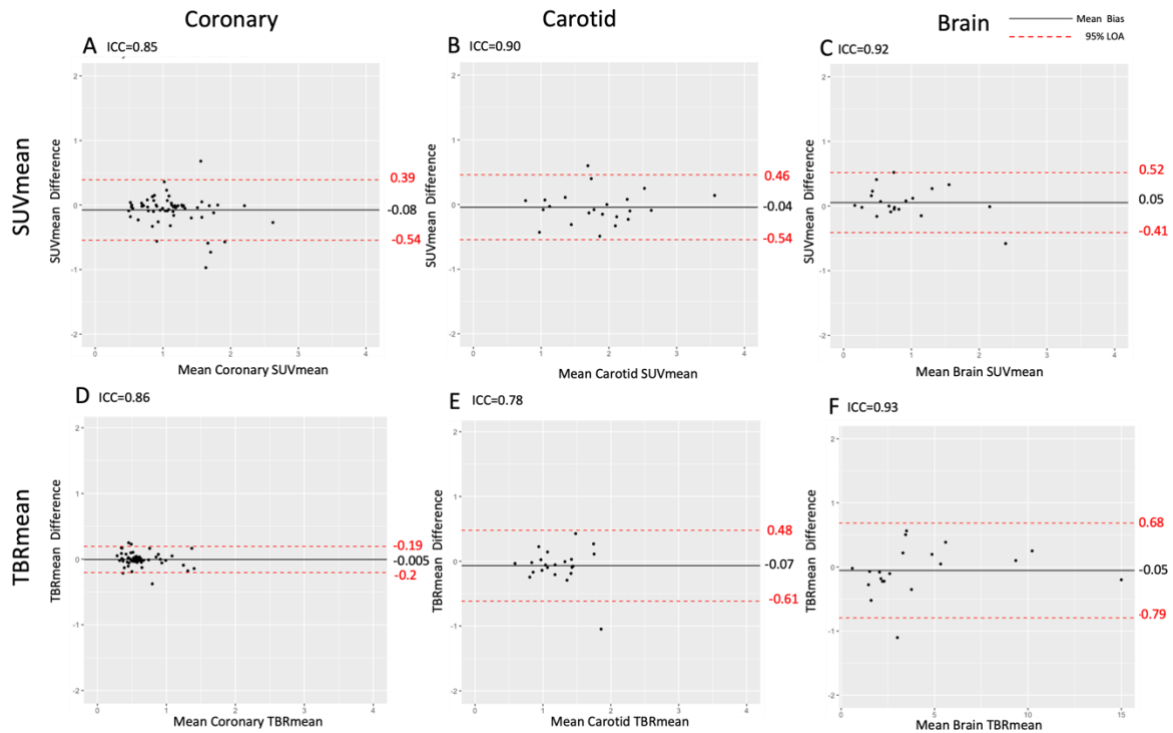

Supplementary Figure ii. Interobserver levels of Agreement in Quantitative Analysis of  $^{18}\text{F}$ -GP1 Uptake.

Figures show mean standardised uptake values ( $\text{SUV}_{\text{mean}}$ ; first row A-C), mean target to background ration ( $\text{TBR}_{\text{mean}}$ ; second row D-F), for coronary artery (first column), carotid arteries (second column) and brain (third column).

ICC = intraclass correlation coefficient, LOA= Limits of agreement.

Please note the difference in x-axis scale for brain  $\text{TBR}_{\text{mean}}$ .
